# Supplementary material for: Combinatorial mixtures of organic solutes for improved liquid/liquid extraction of ions
Source: Royal Society of Chemistry journal article supplement (doi:10.1039/d3sm00693j), 2023-01-01
Supplement: d3sm00693j1.pdf [file d3sm00693j1.pdf]

## Supporting information

### Combinatorial mixtures of organic solutes for improved liquid/liquid extraction of ions

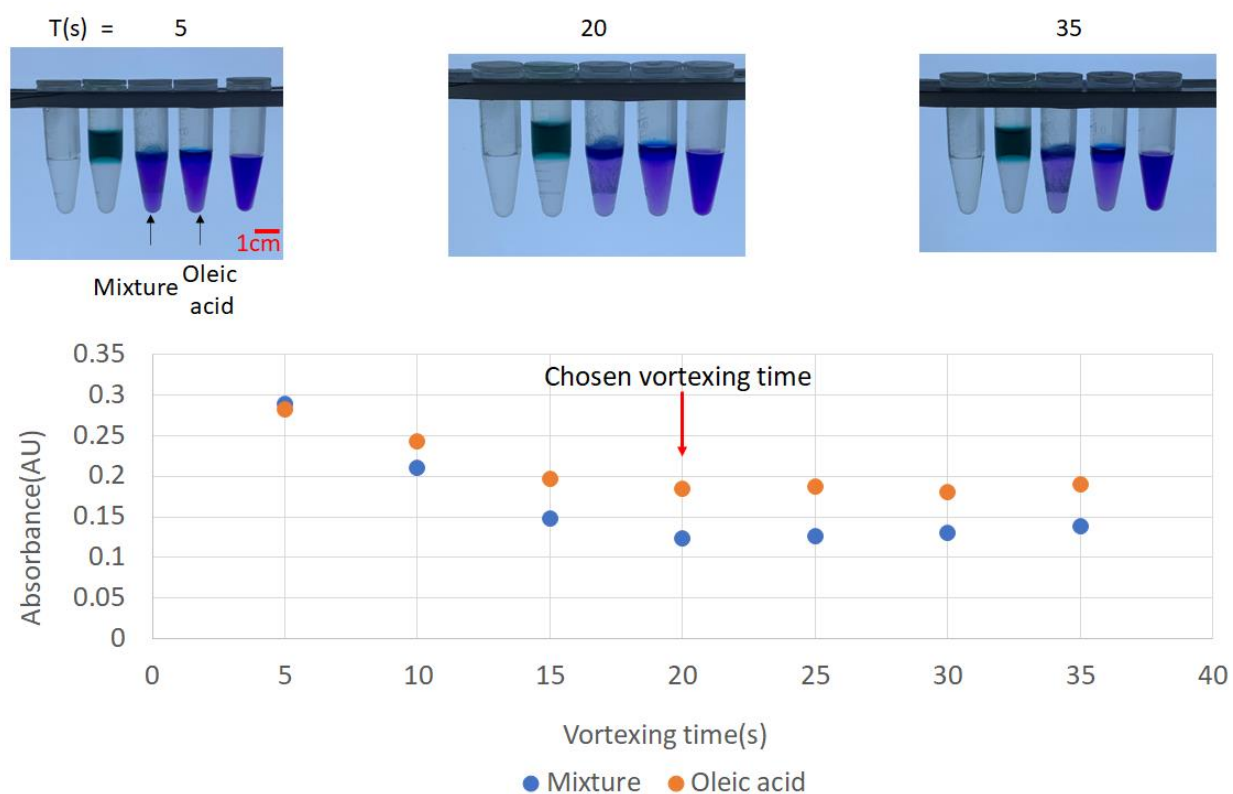

**Figure S1. Evidence of extraction reaching equilibrium after vortexing 20 seconds. The absorbance value of the extraction reaches an equilibrium state after vortexing 20s. (Top) Images of tubes after extraction using pure oleic acid and organic solutes along with vortexing time, and the samples in the tubes from left to right are water, oleic acid/aqueous 1000 ppm copper ions with a volume ratio of 1: 1, mixtures in oleic acid/aqueous copper ions with ratio 1:8, oleic acid/aqueous copper ions, 1000 ppm copper ions.(Bottom) A plot of absorbance as a function of time.**

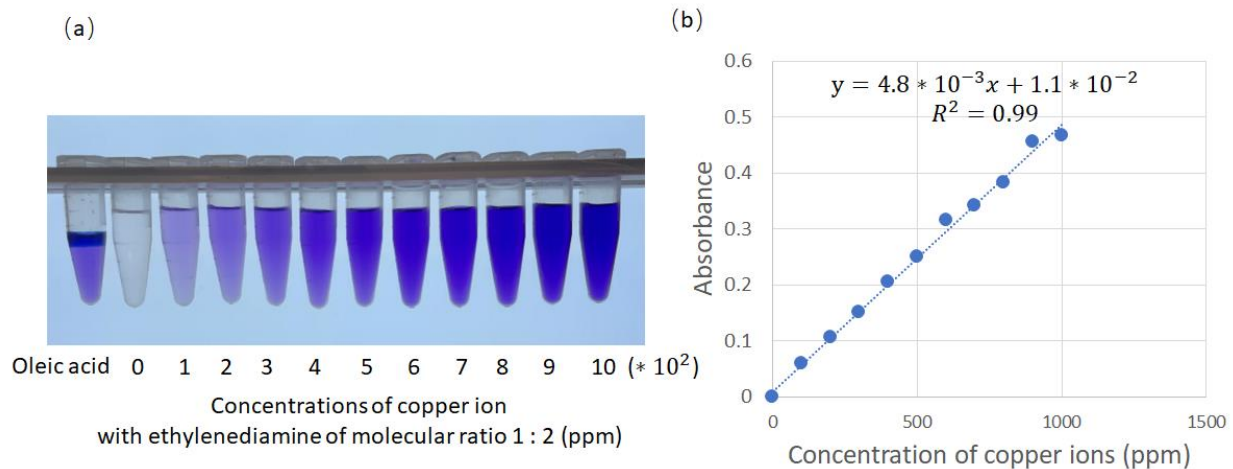

**Figure S2. Calibration of the cell phone camera for centrifuge tube setup. (a) Images of tubes with different concentrations of copper ions with indicator of molecular ratio 1:2. (b) A plot of concentration of copper ions with absorbance.**

(a)

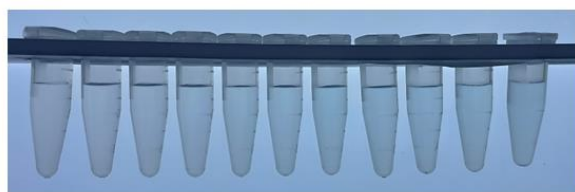

0 1 2 3 4 5 6 7 8 9 10 ( $\times 10^2$ )  
Concentration of copper ion without ethylenediamine (ppm)

(b)

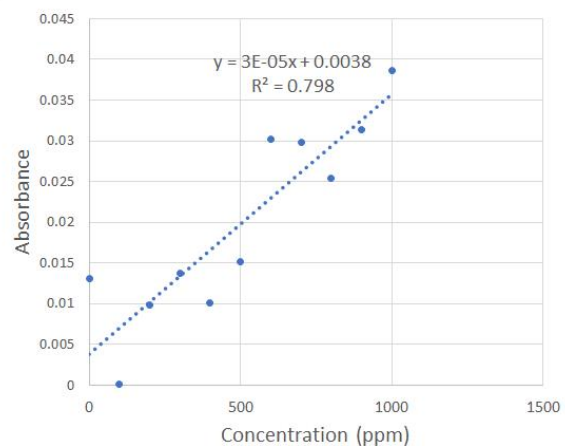

**Figure S3. Calibration of the cell phone camera for copper ions. (a) Smart phone images of tubes with different concentrations of copper ions (without indicator). (b) A plot of concentration with absorbance.**

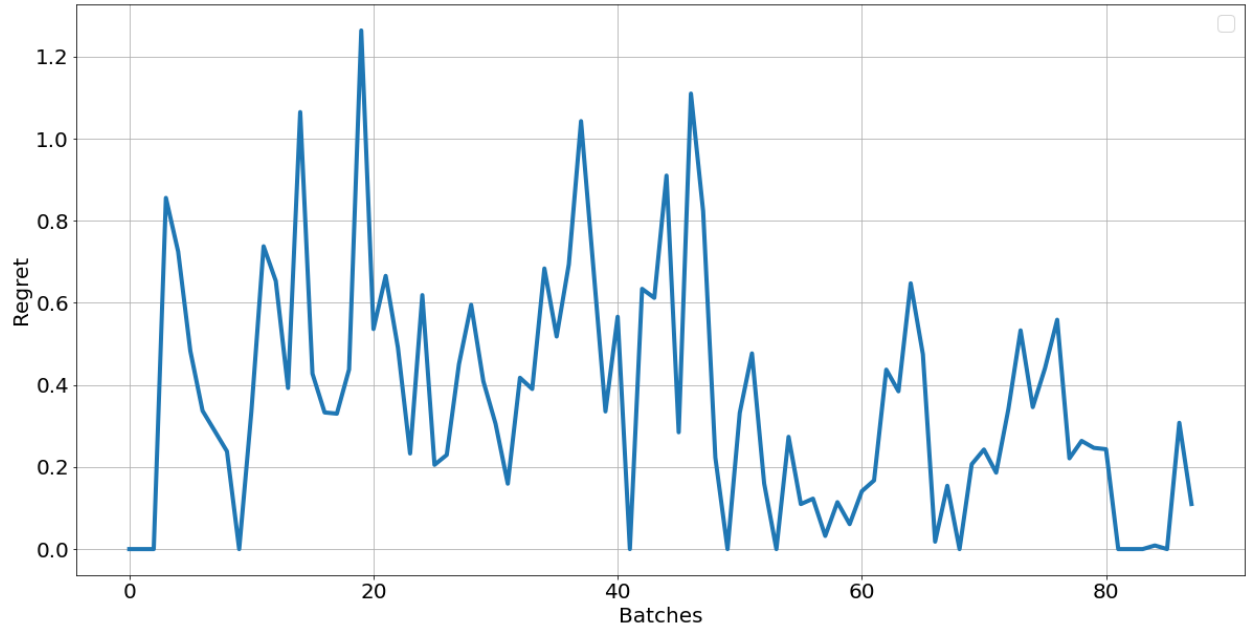

**Figure S4. Demonstration of Bayesian optimization performance through a downward trend of regrets over batches (the regret is defined as the expected difference between optimal strategy and Bayesian strategy).**

| Sample number | Copper ions concentration in water(ppm) | Standard deviation(ppm) | Average variance |
|---------------|-----------------------------------------|-------------------------|------------------|
| 1             | 384.0402977                             | 35.35801516             | 97.78335107      |
| 2             | 263.1275788                             | 103.8762646             |                  |
| 3             | 375.1179503                             | 3.265011627             |                  |
| 4             | 394.5549935                             | 62.87145635             |                  |
| 5             | 364.0729028                             | 145.451705              |                  |
| 6             | 447.7064966                             | 34.25372547             |                  |
| 7             | 551.7766002                             | 123.0477832             |                  |
| 8             | 450.5217577                             | 146.0756935             |                  |
| 9             | 501.9374732                             | 154.3800681             |                  |
| 10            | 565.8556522                             | 149.7774449             |                  |
| 11            | 382.9314156                             | 158.4986765             |                  |
| 12            | 405.9279595                             | 31.52853646             |                  |
| 13            | 396.7559108                             | 158.1762507             |                  |
| 14            | 394.9530589                             | 241.1909338             |                  |
| 15            | 262.6675408                             | 92.0264939              |                  |
| 16            | 229.378658                              | 77.28199625             |                  |
| 17            | 209.6877931                             | 73.16778584             |                  |
| 18            | 214.4402258                             | 64.30642698             |                  |
| 19            | 154.4253635                             | 21.93805726             |                  |
| 20            | 321.1003064                             | 120.8499486             |                  |
| 21            | 213.9290572                             | 56.12809836             |                  |

**Figure S5. Table of 20 combinations with the concentration of copper ion, standard deviation and the average variance.**

(a)

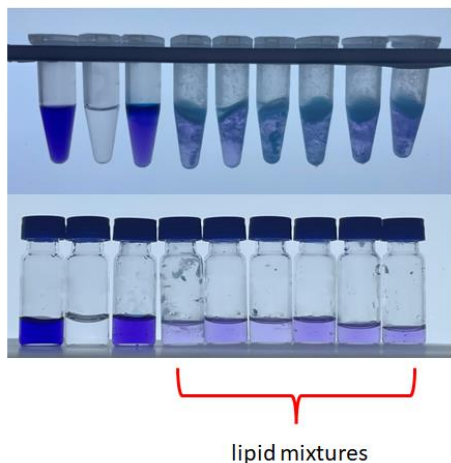

(b)

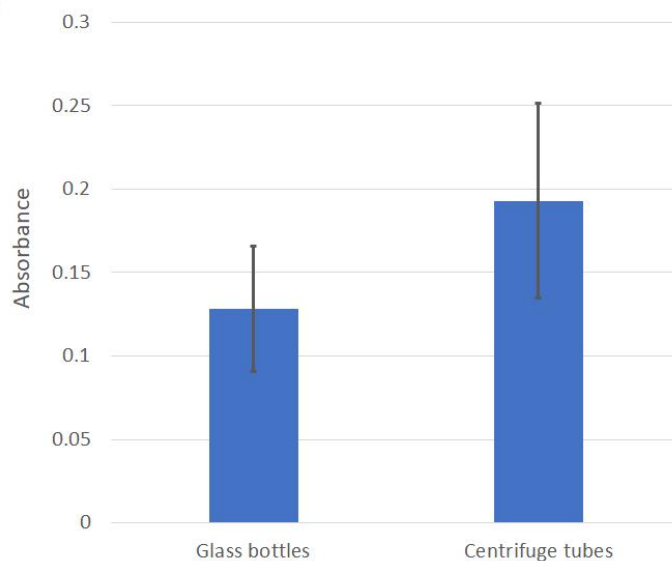

**Figure S6. Measurement of concentrations by taking the aqueous solution out and centrifuging it in a glass bottle after extraction. (a) Images of extraction results in centrifuges tubes and glass bottles, and the samples in the tubes from left to right are 1000 ppm copper ions, water, oleic acid/copper ions with volume ratio 1: 8(control), six replicates of optimal mixtures in oleic acid/copper ions with volume ratio 1:8. (b) A bar plot of absorbance comparison using centrifuges tube and glass bottles with 6 replicates, shows a similar uncertainty.**

| A(mM)    | B(mM)    | C(mM)    | D(mM)    | E(mM)    | Copper ions concentration in water(ppm) |
|----------|----------|----------|----------|----------|-----------------------------------------|
| 15.000   | 120.000  | 7.500    | 7.500    | 7.500    | 545.196                                 |
| 1.875    | 60.000   | 7.500    | 7.500    | 7.500    | 529.127                                 |
| 7.500    | 7.500    | 30.000   | 30.000   | 30.000   | 520.508                                 |
| 250.000  | 0.122    | 500.000  | 250.000  | 7.813    | 520.508                                 |
| 31.250   | 0.122    | 125.000  | 62.500   | 15.625   | 520.508                                 |
| 0.244    | 0.244    | 7.813    | 250.000  | 125.000  | 520.508                                 |
| 250.000  | 0.122    | 125.000  | 0.122    | 250.000  | 520.508                                 |
| 0.244    | 250.000  | 250.000  | 0.061    | 62.500   | 520.508                                 |
| 7.813    | 0.977    | 0.977    | 0.488    | 125.000  | 520.508                                 |
| 0.977    | 62.500   | 250.000  | 0.122    | 500.000  | 376.483                                 |
| 31.250   | 1000.000 | 3.906    | 7.813    | 31.250   | 376.483                                 |
| 0.061    | 0.977    | 0.488    | 31.250   | 1000.000 | 376.483                                 |
| 1.953    | 0.244    | 500.000  | 1.953    | 500.000  | 376.483                                 |
| 31.250   | 0.488    | 0.977    | 0.977    | 0.061    | 376.483                                 |
| 15.625   | 3.906    | 1000.000 | 500.000  | 3.906    | 376.483                                 |
| 1.953    | 125.000  | 0.244    | 0.244    | 31.250   | 376.483                                 |
| 1.953    | 62.500   | 0.977    | 1000.000 | 7.813    | 376.483                                 |
| 0.061    | 1.953    | 31.250   | 0.122    | 62.500   | 376.483                                 |
| 0.122    | 15.625   | 3.906    | 125.000  | 0.061    | 376.483                                 |
| 125.000  | 500.000  | 250.000  | 250.000  | 1000.000 | 376.483                                 |
| 7.813    | 31.250   | 62.500   | 0.061    | 125.000  | 376.483                                 |
| 250.000  | 250.000  | 1.953    | 1000.000 | 62.500   | 376.483                                 |
| 250.000  | 0.244    | 0.122    | 250.000  | 125.000  | 376.483                                 |
| 7.813    | 1000.000 | 15.625   | 7.813    | 125.000  | 376.483                                 |
| 1000.000 | 0.244    | 1000.000 | 0.061    | 250.000  | 376.483                                 |
| 0.244    | 1000.000 | 0.977    | 0.488    | 62.500   | 376.483                                 |
| 125.000  | 125.000  | 3.906    | 3.906    | 250.000  | 376.483                                 |
| 0.488    | 0.977    | 7.813    | 0.977    | 3.906    | 376.483                                 |
| 62.500   | 15.625   | 0.977    | 0.977    | 0.061    | 376.483                                 |
| 15.625   | 500.000  | 7.813    | 1.953    | 3.906    | 376.483                                 |
| 7.813    | 7.813    | 0.488    | 125.000  | 7.813    | 376.483                                 |
| 500.000  | 1000.000 | 0.061    | 0.061    | 0.488    | 376.483                                 |
| 125.000  | 0.061    | 1.953    | 0.977    | 1000.000 | 376.483                                 |
| 3.906    | 31.250   | 0.977    | 250.000  | 3.906    | 376.483                                 |
| 1000.000 | 0.061    | 31.250   | 0.977    | 0.977    | 376.483                                 |
| 31.250   | 0.977    | 31.250   | 7.813    | 0.122    | 376.483                                 |
| 125.000  | 0.061    | 500.000  | 62.500   | 62.500   | 376.483                                 |
| 15.625   | 125.000  | 500.000  | 250.000  | 125.000  | 376.483                                 |
| 0.977    | 250.000  | 250.000  | 0.122    | 15.625   | 376.483                                 |

|          |          |          |          |          |         |
|----------|----------|----------|----------|----------|---------|
| 15.625   | 3.906    | 7.813    | 15.625   | 500.000  | 376.483 |
| 15.625   | 31.250   | 0.061    | 0.488    | 62.500   | 376.483 |
| 0.061    | 1000.000 | 15.625   | 125.000  | 3.906    | 366.531 |
| 0.244    | 15.625   | 500.000  | 1000.000 | 0.061    | 366.531 |
| 0.061    | 0.061    | 0.244    | 500.000  | 15.625   | 366.531 |
| 62.500   | 0.122    | 1000.000 | 3.906    | 31.250   | 366.531 |
| 1.953    | 0.977    | 0.488    | 0.244    | 1000.000 | 366.531 |
| 3.906    | 125.000  | 125.000  | 500.000  | 500.000  | 366.531 |
| 500.000  | 125.000  | 0.244    | 0.122    | 7.813    | 366.531 |
| 1000.000 | 1000.000 | 7.813    | 31.250   | 15.625   | 366.531 |
| 62.500   | 1000.000 | 0.488    | 1.953    | 31.250   | 310.178 |
| 62.500   | 1000.000 | 0.122    | 3.906    | 7.813    | 310.178 |
| 500.000  | 1000.000 | 31.250   | 1.953    | 1000.000 | 310.178 |
| 0.488    | 1000.000 | 0.244    | 0.244    | 31.250   | 310.178 |
| 31.250   | 1000.000 | 7.813    | 0.977    | 250.000  | 300.445 |
| 125.000  | 1000.000 | 0.977    | 0.244    | 15.625   | 300.445 |
| 0.244    | 1000.000 | 31.250   | 15.625   | 7.813    | 300.445 |
| 125.000  | 1000.000 | 1.953    | 62.500   | 500.000  | 300.445 |
| 0.061    | 1000.000 | 0.244    | 0.488    | 0.061    | 300.445 |
| 250.000  | 1000.000 | 3.906    | 0.122    | 0.488    | 300.445 |
| 0.122    | 1000.000 | 15.625   | 0.244    | 250.000  | 300.445 |
| 0.488    | 1000.000 | 62.500   | 7.813    | 0.122    | 300.445 |
| 1000.000 | 1000.000 | 1.953    | 0.244    | 125.000  | 300.445 |
| 125.000  | 1000.000 | 62.500   | 0.122    | 500.000  | 300.445 |
| 250.000  | 1000.000 | 1.953    | 0.244    | 125.000  | 300.445 |
| 1000.000 | 1000.000 | 0.977    | 0.061    | 0.488    | 300.445 |
| 1000.000 | 1000.000 | 31.250   | 0.061    | 500.000  | 300.445 |
| 250.000  | 1000.000 | 0.122    | 0.977    | 31.250   | 300.445 |
| 31.250   | 1000.000 | 0.488    | 31.250   | 0.488    | 300.445 |
| 250.000  | 1000.000 | 31.250   | 0.244    | 0.122    | 263.128 |
| 0.977    | 1000.000 | 31.250   | 62.500   | 3.906    | 263.128 |
| 1000.000 | 1000.000 | 1.953    | 62.500   | 500.000  | 263.128 |
| 62.500   | 1000.000 | 31.250   | 15.625   | 250.000  | 263.128 |
| 3.906    | 1000.000 | 62.500   | 0.061    | 62.500   | 263.128 |
| 125.000  | 1000.000 | 15.625   | 15.625   | 125.000  | 263.128 |
| 3.906    | 1000.000 | 1.953    | 3.906    | 1000.000 | 263.128 |
| 3.906    | 1000.000 | 62.500   | 1.953    | 1000.000 | 263.128 |
| 0.977    | 1000.000 | 3.906    | 31.250   | 7.813    | 263.128 |
| 62.500   | 1000.000 | 0.122    | 62.500   | 7.813    | 263.128 |
| 7.813    | 1000.000 | 0.977    | 62.500   | 31.250   | 263.128 |
| 31.250   | 1000.000 | 0.061    | 0.061    | 0.977    | 263.128 |
| 7.813    | 1000.000 | 62.500   | 31.250   | 7.813    | 263.128 |
| 0.488    | 1000.000 | 62.500   | 62.500   | 0.488    | 262.668 |



|         |          |        |        |         |         |
|---------|----------|--------|--------|---------|---------|
| 31.250  | 1000.000 | 0.977  | 62.500 | 0.488   | 229.379 |
| 31.250  | 1000.000 | 62.500 | 0.244  | 15.625  | 209.688 |
| 62.500  | 1000.000 | 3.906  | 31.250 | 500.000 | 209.688 |
| 125.000 | 1000.000 | 1.953  | 15.625 | 500.000 | 154.425 |
| 3.906   | 1000.000 | 7.813  | 31.250 | 7.813   | 154.425 |
| 0.061   | 1000.000 | 0.061  | 0.061  | 500.000 | 154.425 |

**Figure S7. Table of combinations with the concentration of copper ion.**

(a)

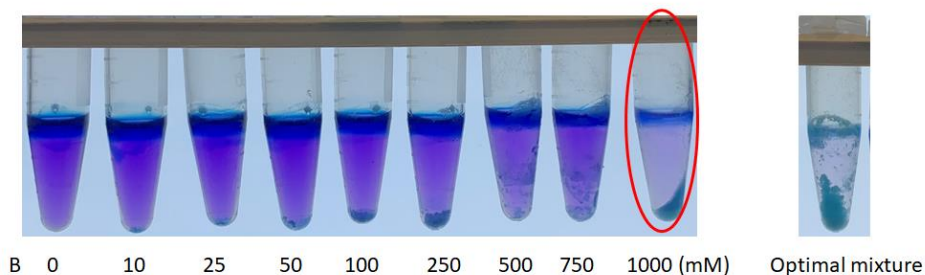

(b)

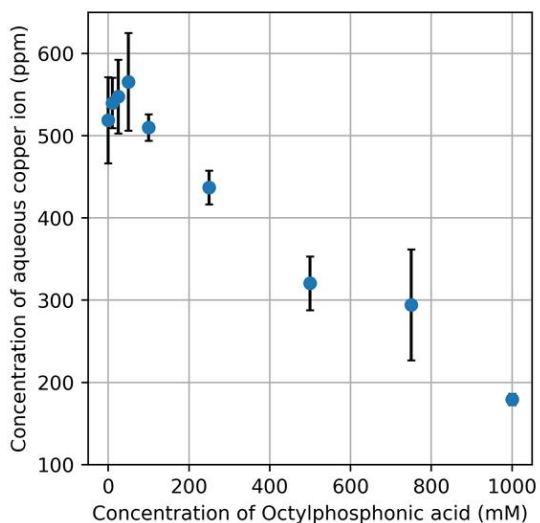

(c)

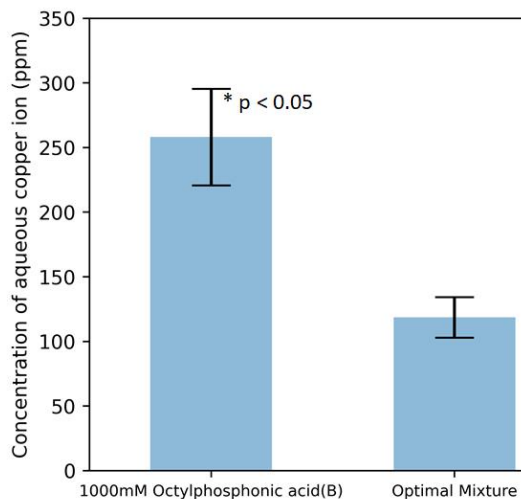

**Figure S8. The combination performs better than the best individual component. Octylphosphonic acid improves extraction efficiency at a concentration above 200 mM; The extraction efficiency of the best mixture is better than pure component B.(a) Tube image of extraction using different concentrations of octylphosphonic acid in oleic acid/ 1000 ppm copper ions with a volume ratio of (1:8) and compare with the extraction performance using optimal mixtures. (b) Relationship between the different concentration of octylphosphonic acid and ions remaining in water after extraction (c) Bar plot of extraction performance between 1000 mM octylphosphonic acid and optimal mixture, t-test shows two samples are significantly different with p-value < 0.05 with a sample size of 4.**

(a)

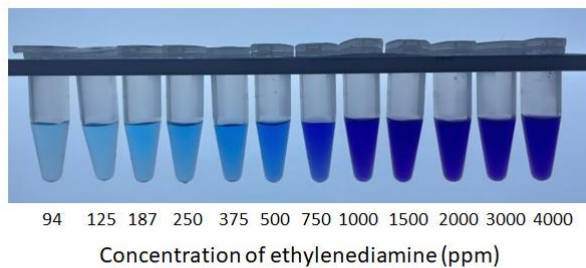

(b)

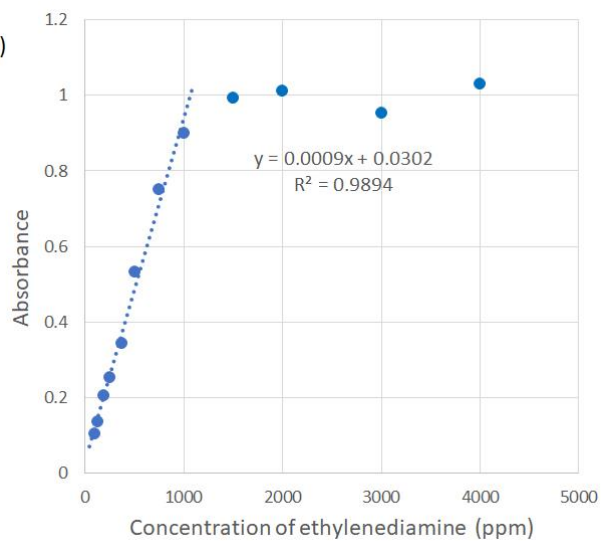

**Figure S9. Calibration of the cell phone camera for ethylenediamine as an indicator of copper ions. (a) Tube images of different concentrations of ethylenediamine for 1000 ppm copper ions. (b) A plot of concentration with absorbance.**

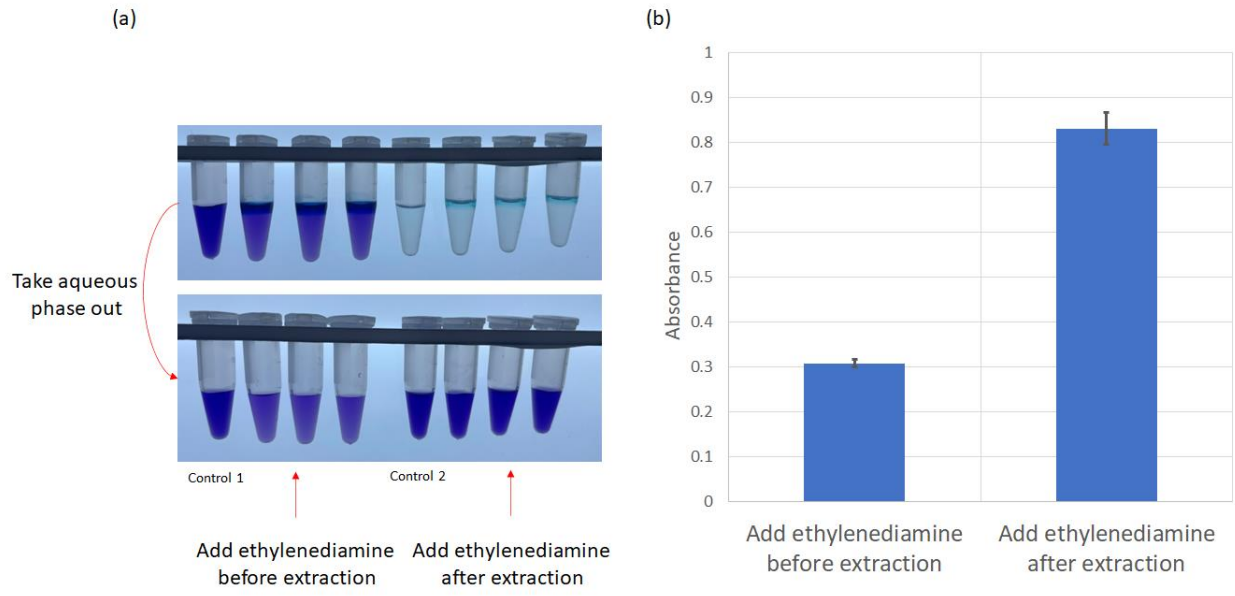

**Figure S10. Extraction comparison with/without the addition of ethylenediamine in the water. (a) Images of tubes after extraction done by adding ethylenediamine before and after extraction, and the samples in the tubes from left to right are 1000 ppm copper ions and 3 replicates of oleic acid/copper ions of ratio 1:8 adding ethylenediamine before and after extraction. (b) A bar plot of extraction result of adding ethylenediamine before and after extraction.**

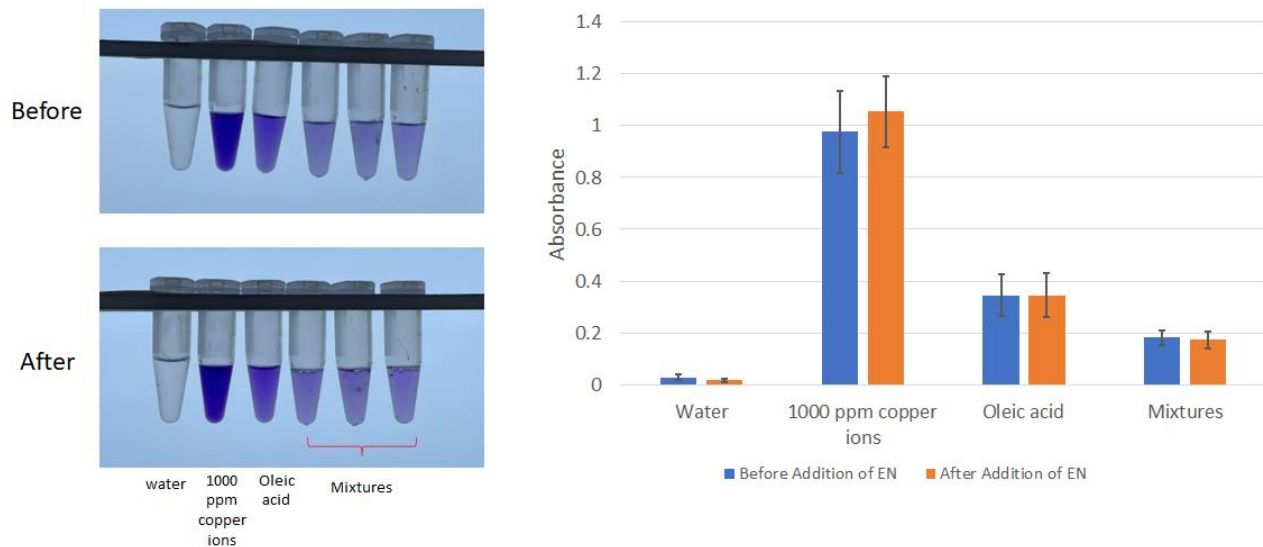

**Figure S11. Extraction performance before and after the addition of ethylenediamine in the aqueous after the extraction of copper ions. The error bar in the graph represents the standard deviation of measurement and replicates.**

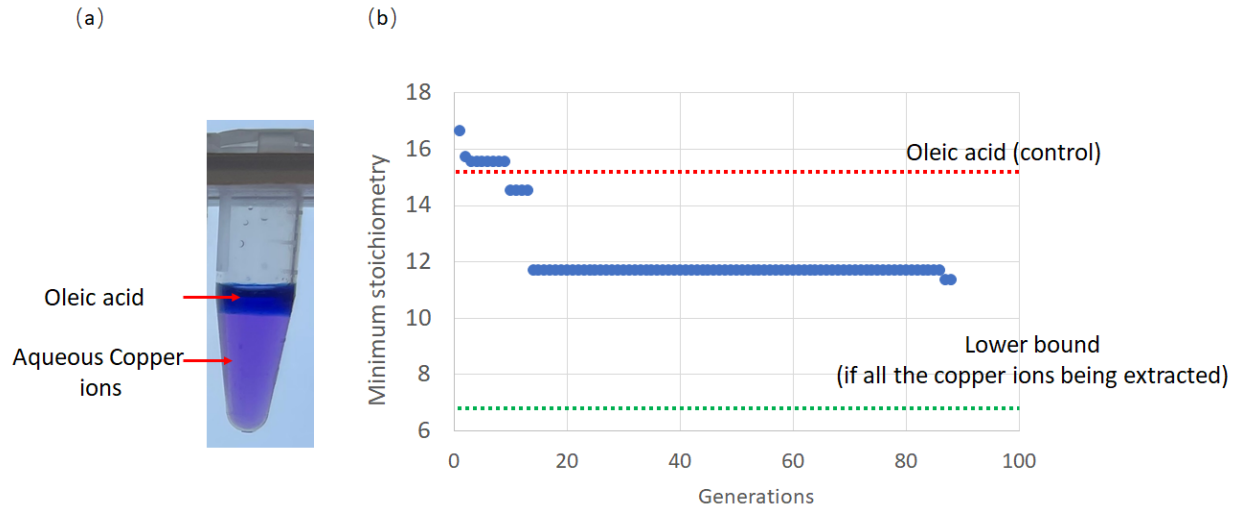

**Figure S12. Stoichiometry of extraction experiment with Bayesian optimization. (a) tube image using only octylphosphonic acid and control. (b) A plot of lipid mixture with best stoichiometry value along with generations.**

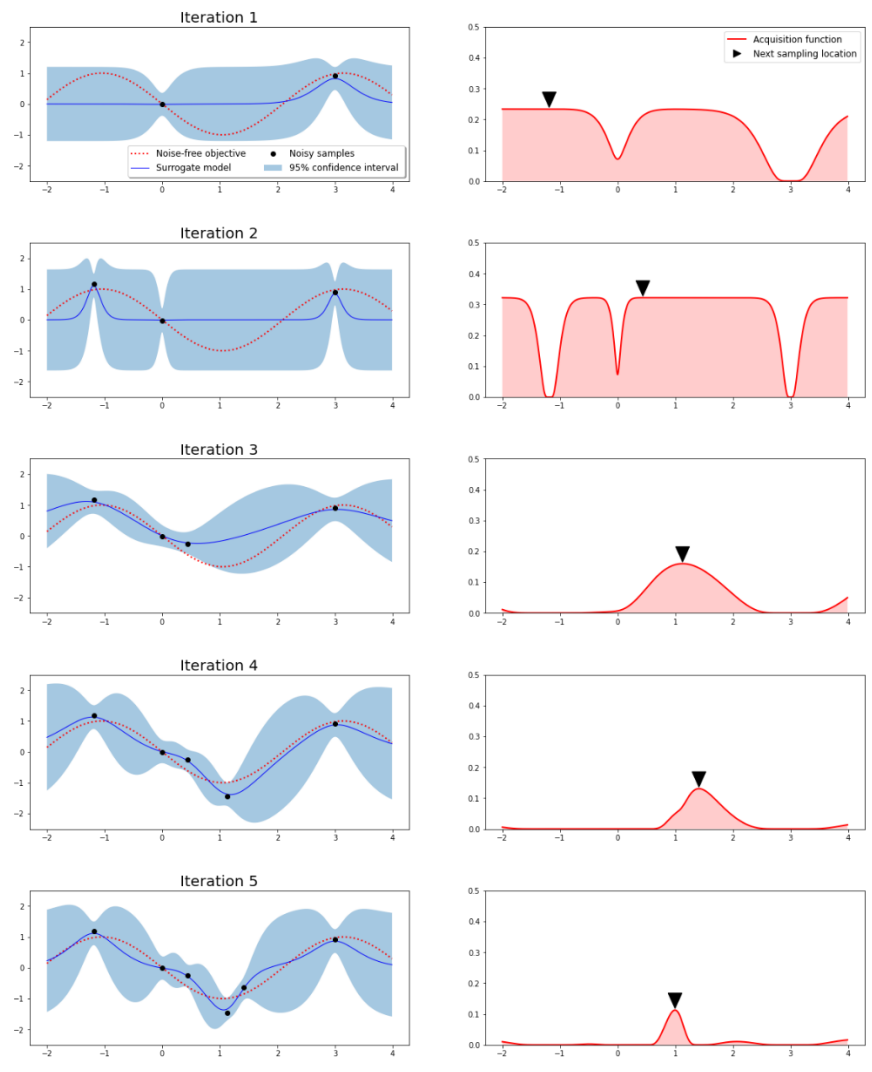

**Figure S13. An illustration of the one-dimensional BO procedure over five iterations.**

```
# -*- coding: utf-8 -*-
"""Supplementary_BO.ipynb
```

Automatically generated by Colaboratory.

Original file is located at

```
https://colab.research.google.com/drive/1x8SgDNpBuJWcxig2TLDyQUGDiTui039R
"""
```

```
##### Attatched python code is
executed in google colab
```

```
#####
#####
#####
#####
```

```
#### Norimal inverse gamma distribution
from numpy import sum, mean, size, sqrt
from scipy.stats import norm, invgamma
```

```
def draw_mus_and_sigmas(data,m0,k0,s_sq0,v0,n_samples=10000):
```

```
    # number of samples
```

```
    N = size(data)
```

```
    # find the mean of the data
```

```
    the_mean = mean(data)
```

```
    # sum of squared differences between data and mean
```

```
    SSD = sum( (data - the_mean)**2 )
```

```
    # combining the prior with the data - page 79 of Gelman et al.
```

```
    # to make sense of this note that
```

```
    #  $\text{inv-chi-sq}(v,s^2) = \text{inv-gamma}(v/2,(v*s^2)/2)$ 
```

```
    kN = float(k0 + N)
```

```
    mN = (k0/kN)*m0 + (N/kN)*the_mean
```

```
    vN = v0 + N
```

```
    vN_times_s_sqN = v0*s_sq0 + SSD + (N*k0*(m0-the_mean)**2)/kN
```

```
    s_sqN = vN_times_s_sqN/vN
```

```
    # 1) draw the variances from an inverse gamma
```

```
    # (params: alpha, beta)
```

```
    alpha = vN/2
```

```
    beta = vN_times_s_sqN/2
```

```
    # thanks to wikipedia, we know that:
```

```
    # if  $X \sim \text{inv-gamma}(a,1)$  then  $b*X \sim \text{inv-gamma}(a,b)$ 
```

```
    sig_sq_samples = beta*invgamma.rvs(alpha,size=n_samples)
```



```

# 2) draw means from a normal conditioned on the drawn sigmas
# (params: mean_norm, var_norm)
mean_norm = mN
var_norm = sqrt(sig_sq_samples)/kN
mu_samples = norm.rvs(mean_norm,scale=var_norm,size=n_samples)

# 3) return the mu_samples and sig_sq_samples
return kN,mN,vN,s_sqN,mu_samples, sig_sq_samples

```

#### A sampling test from normal inverse gamma distribution

```

from numpy.random import normal
from matplotlib import pyplot as plt
from statistics import median

```

# step 1: define prior parameters for the normal and inverse gamma

```

m0 = 0.
k0 = 1.
s_sq0 = 1.
v0 = 1.

```

# step 2: get some random data, with slightly different statistics

```

data1 = normal(loc=5, scale=1, size=100)
#data2 = normal(loc=-1, scale=1, size=10)
##data3 = normal(loc=15, scale=1, size=100)
#data4 = normal(loc=4, scale=1, size=10)
#data5 = normal(loc=8, scale=1, size=10)
##data6 = normal(loc=7.5, scale=1, size=10)
#data7 = normal(loc=7.8, scale=1, size=10)

```

# step 3: get posterior samples

```

k1,m1,v1,s_sq1,mus1,sig_sqs1 = draw_mus_and_sigmas(data1,m0,k0,s_sq0,v0)
plt.plot(sig_sqs1)
plt.figure()
plt.hist(sig_sqs1,bins=20)
##mus2,sig_sqs2 = draw_mus_and_sigmas(data2,m0,k0,s_sq0,v0)
#mus3,sig_sqs3 = draw_mus_and_sigmas(data3,m0,k0,s_sq0,v0)
#mus4,sig_sqs4 = draw_mus_and_sigmas(data4,m0,k0,s_sq0,v0)
#mus5,sig_sqs5 = draw_mus_and_sigmas(data5,m0,k0,s_sq0,v0)
#mus6,sig_sqs6 = draw_mus_and_sigmas(data6,m0,k0,s_sq0,v0)
#mus7,sig_sqs7 = draw_mus_and_sigmas(data7,m0,k0,s_sq0,v0)

```

```

##### Bayesian optimization

!pip install Gpy==1.9.8
!pip install GpyOpt==1.2.6
import numpy as np

import GPy
import GPyOpt

from GPyOpt.methods import BayesianOptimization

np.random.seed(1)
#Continuous domain
#bounds = np.array([0,1000])

#Discrete domain
base = 2
max = 1000
x = np.arange(0,15)
bounds = max/(base**x)

##Matern kernel for GP
kernel = GPy.kern.Matern52(input_dim=5, variance=1.0, lengthscale=1.0)

##Bound for five lipid
bds = [{'name': 'Lipid', 'type': 'discrete', 'domain': bounds, 'dimensionality': 5}]

#####Constraint: Manully add constraints sequentially to block the previous suggested
combinations and generate a new one. #####
con = [{'name':'constr_1','constraint':'-(x[:,1]-1000.0)'},
      {'name':'constr_2','constraint':'x[:,2]-125.0+0.000001'},
      {'name':'constr_3','constraint':'x[:,3]-125.0+0.000001'},

      ]

##### We manually add the observed X and y in the initial samples of GP for each run to
sequentially optimized the combination. The first three are the initial samples randomly
tried.#####
X = np.array([
[15, 120, 7.5, 7.5, 7.5],
[1.875, 60, 7.5, 7.5, 7.5],
[7.5, 7.5, 30, 30, 30],

```

[250.0,0.1220703125,500.0,250.0,7.8125],  
[31.25,0.1220703125,125.0,62.5,15.625],  
[0.244140625,0.244140625,7.8125,250.0,125.0],  
[250.0,0.1220703125,125.0,0.1220703125,250.0],  
[0.244140625,250.0,250.0,0.06103515625,62.5],  
[7.8125,0.9765625,0.9765625,0.48828125,125.0],  
[0.9765625,62.5,250.0,0.1220703125,500.0],  
[31.25,1000.0,3.90625,7.8125,31.25],  
[0.06103515625,0.9765625,0.48828125,31.25,1000.0],

[1.953125,0.244140625,500.0,1.953125,500.0],  
[31.25,0.48828125,0.9765625,0.9765625,0.06103515625],  
[15.625,3.90625,1000.0,500.0,3.90625],

[1.953125,125.0,0.244140625,0.244140625,31.25],  
[1.953125,62.5,0.9765625,1000.0,7.8125],  
[0.06103515625,1.953125,31.25,0.1220703125,62.5],

[0.1220703125,15.625,3.90625,125.0,0.06103515625],  
[125.0,500.0,250.0,250.0,1000.0],  
[7.8125,31.25,62.5,0.06103515625,125.0],

[250.0,250.0,1.953125,1000.0,62.5],  
[250.0,0.244140625,0.1220703125,250.0,125.0],  
[7.8125,1000.0,15.625,7.8125,125.0],

[1000,0.244140625,1000,0.06103515625,250],  
[0.244140625,1000,0.9765625,0.48828125,62.5],  
[125.0,125.0,3.90625,3.90625,250.0],

[0.48828125,0.9765625,7.8125,0.9765625,3.90625],  
[62.5,15.625,0.9765625,0.9765625,0.06103515625],  
[15.625,500.0,7.8125,1.953125,3.90625],

[7.8125,7.8125,0.48828125,125.0,7.8125],  
[500.0,1000.0,0.06103515625,0.06103515625,0.48828125],  
[125.0,0.06103515625,1.953125,0.9765625,1000.0],

[3.90625,31.25,0.9765625,250.0,3.90625],  
[1000.0,0.06103515625,31.25,0.9765625,0.9765625],

[31.25,0.9765625,31.25,7.8125,0.1220703125],

[125.0, 0.06103515625, 500.0, 62.5, 62.5],  
[15.625, 125.0, 500.0, 250.0, 125.0],  
[0.9765625, 250.0, 250.0, 0.1220703125, 15.625],

[15.625,3.90625,7.8125,15.625,500.0],  
[15.625,31.25,0.06103515625,0.48828125, 62.5],  
[0.06103515625,1000.0,15.625,125.0,3.90625],

[0.244140625, 15.625, 500.0, 1000.0, 0.06103515625],  
[0.06103515625, 0.06103515625, 0.244140625, 500.0, 15.625],  
[62.5, 0.1220703125, 1000.0, 3.90625, 31.25],

[1.953125, 0.9765625, 0.48828125, 0.244140625, 1000.0],  
[3.90625, 125.0, 125.0, 500.0, 500.0],  
[500.0, 125.0, 0.244140625, 0.1220703125, 7.8125],

[1000.0,1000.0,7.8125,31.25,15.625],  
[62.5,1000.0,0.48828125,1.953125,31.25],  
[62.5,1000.0,0.1220703125,3.90625,7.8125],

[500.0,1000.0,31.25,1.953125,1000.0],  
[0.48828125,1000.0,0.244140625,0.244140625,31.25],  
[31.25,1000.0,7.8125,0.9765625,250.0],

[125.0, 1000.0, 0.9765625, 0.244140625, 15.625],  
[0.244140625, 1000.0, 31.25, 15.625, 7.8125],  
[125.0,1000.0,1.953125,62.5,500.0],

[0.06103515625,1000.0,0.244140625,0.48828125,0.06103515625],  
[250.0,1000.0,3.90625,0.1220703125,0.48828125],  
[0.1220703125,1000.0,15.625,0.244140625,250.0],

[0.48828125, 1000.0, 62.5, 7.8125, 0.1220703125],  
[1000.0, 1000.0, 1.953125, 0.244140625, 125.0],  
[125.0, 1000.0, 62.5, 0.1220703125, 500.0],

[250.0,1000.0,1.953125,0.244140625,125.0],

[1000.0,1000.0,0.9765625,0.06103515625,0.48828125],

[1000.0,1000.0,31.25,0.06103515625,500.0],

[250.0,1000.0,0.1220703125,0.9765625,31.25],

[31.25,1000.0,0.48828125,31.25,0.48828125],

[250.0,1000.0,31.25,0.244140625,0.1220703125],

[0.9765625,1000.0,31.25,62.5,3.90625],

[1000.0,1000.0,1.953125,62.5,500.0],

[62.5,1000.0,31.25,15.625,250.0],

[3.90625,1000.0,62.5,0.06103515625,62.5],

[125.0,1000.0,15.625,15.625,125.0],

[3.90625,1000.0,1.953125,3.90625,1000.0],

[3.90625,1000.0,62.5,1.953125,1000.0],

[0.9765625,1000.0,3.90625,31.25,7.8125],

[62.5,1000.0,0.1220703125,62.5,7.8125],

[7.8125,1000.0,0.9765625,62.5,31.25],

[31.25,1000.0,0.06103515625,0.06103515625,0.9765625],

[7.8125,1000.0,62.5,31.25,7.8125],

[0.48828125,1000.0,62.5,62.5,0.48828125],

[31.25,1000.0,0.9765625,62.5,0.48828125],

[31.25,1000.0,62.5,0.244140625,15.625],

[ 62.5,1000.0,3.90625,31.25,500.0],

[ 125.0,1000.0,1.953125,15.625,500.0],

[3.90625,1000.0,7.8125,31.25,7.8125],

[0.06103515625,1000.0,0.06103515625,0.06103515625,500.0]

)

```
y = np.array([
1.048824131,
1.019156664,
1.003246445,

1.859133429,
1.728314403,
1.486032029,

1.340374067,
1.291074878,
1.241435245,

0.737352393,
1.072208218,
1.475318643,

1.390809871,
1.129947411,
1.802342897,

1.165039202,
1.070355892,
1.067391564,

1.175026627,
2.001202681,
1.273685468,

1.403225241,
1.228475345,
0.970363522,

1.356263681,
0.942686627,
0.96697517,

1.187786093,
1.332546874,
1.146295319,
```

1.042671082,  
0.896783996,  
1.154858516,

1.127543065,  
1.42114431,  
1.255466996,

1.431245026,  
1.780268116,  
1.426882571,

1.072903122,  
1.303509767,  
0.718979632,

1.353187628,  
1.331260153,  
1.629187232,

1.003715271,  
1.829033333,  
1.542589328,

0.941977352,  
0.614944568,  
0.946972622,

1.091737437,  
0.774839267,  
0.596975675,

0.870516692,  
0.706652393,  
0.719849778,

0.629092735,  
0.711292765,  
0.657801492,

0.738030993,  
0.764355007,

1.034278979,

0.981541443,  
1.244570874,  
1.071772202,

0.615097421,  
0.751305165,  
0.528081684,

0.734833139,  
0.770716911,  
0.714442282,

0.868842763,  
1.060972185,  
0.874040168,

0.968961489,  
1.086964281,  
0.749257998,

0.791713156,  
0.774780143,  
0.771451801,

0.527232383,  
0.465775984,  
0.429423618,

0.43819734,  
0.327400671,  
0.635108258,

0.437253644,

]  
)

##### Manully input the newly-generated samples (9 samples per run: 3 combinations and each with 3 replicates) #####

y\_update= np.array([





```
constraints = con,  
model_type='GP',  
kernel=kernel,  
acquisition_type='EI',  
##### Manually adjust the jitter for each run except for the initial run (The  
initial jitter we set is 0.01)#####  
acquisition_jitter = 0.0001348,
```

```
X=X,  
Y=y.reshape(-1,1),  
noise_var= median(sig_sqs),
```

```
exact_feval=False,  
normalize_Y=False,  
maximize=False)
```

```
optimizer.run_optimization(max_iter=0)
```

```
print('The combination in the history:', optimizer.X )  
print('The scores for all the combinations in the history:', optimizer.Y )  
print('The best combination in the history:', optimizer.X[optimizer.Y.argmax()])  
print('The best score for all the combinations in the history:', min(optimizer.Y) )
```

```
next_combination = optimizer.suggest_next_locations()  
print('The next combination would be:', next_combination)
```

```
print('A: ', next_combination[0][0] )  
print('B: ', next_combination[0][1] )  
print('C: ', next_combination[0][2] )  
print('D: ', next_combination[0][3] )  
print('E: ', next_combination[0][4] )
```

```
##### The code for dynamic acquisition jitter for next run  
import itertools
```

```
bounds = list(bounds)  
a = [bounds,bounds,bounds,bounds,bounds]  
combination_a = list(itertools.product(*a))
```

```
combination_a = np.array(combination_a)
```

```
sum_var = 0  
time = 0
```

```
for i in combination_a:
    sum_var = (sum_var + (optimizer.model.predict(i)[1])**2)
    time += 1

average_var = sum_var/time

f_star = min(optimizer.Y)

jitter =(average_var/(1/f_star))/(1.22652742*100)
print(jitter)
#print( optimizer.model.predict( np.array([[15.625, 62.5, 250.0, 7.8125, 0.244140625]]) )[1] )
#np.shape(next_combination)
#print(next_combination)
```
